# Supplementary material for: Reconsideration of the Semaphorin-3A Binding Motif Found in Chondroitin Sulfate Using Galnac4s-6st-Knockout Mice
Source: PubMed Central journal article supplement (PMC7694144; doi:10.3390/biom10111499), 2020-10-30

# Supplementary Figure S1

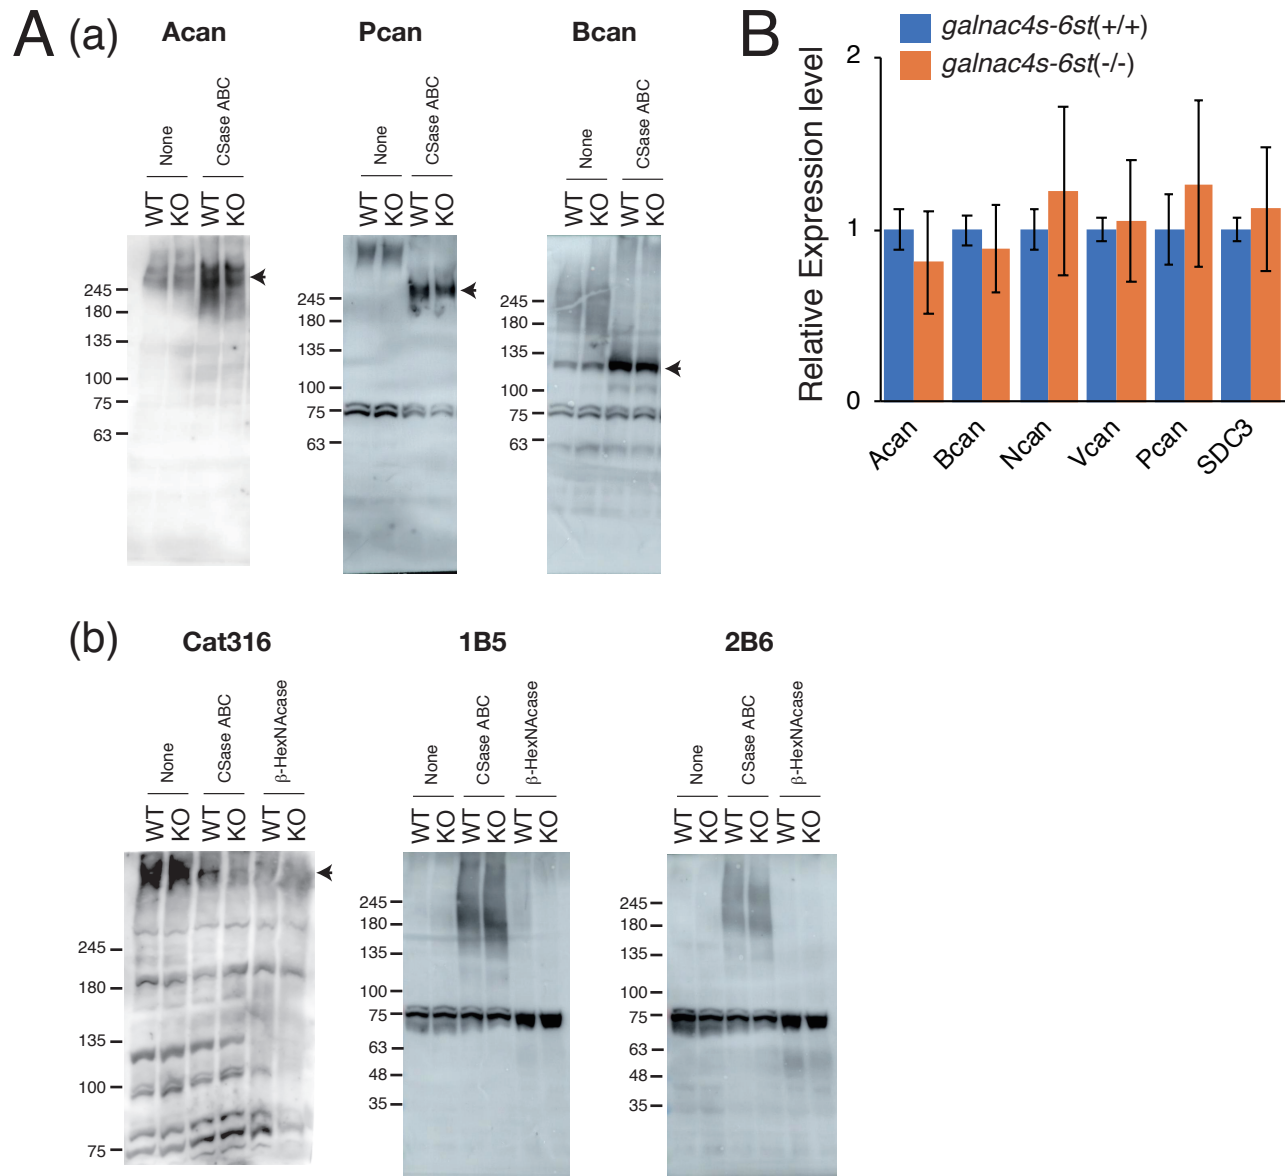

## Supplementary Figure S1. The expression level of chondroitin sulfate proteoglycans was hardly affected by the loss of E units

A, (a) Brain extracts prepared from *galnac4s-6st(+/+)* (WT) and *galnac4s-6st(-/-)* (KO) mice treated with or without chondroitinase ABC were analyzed by immunoblotting using antibodies against aggrecan, phosphacan, and brevican. Proteoglycan core proteins revealed after digestion with chondroitinase ABC are indicated by arrowheads. (b) Chondroitin sulfate proteoglycans were detected using anti-CS antibodies, Cat316, 1B5, and 2B6. The white triangle indicates proteoglycans carrying Cat316-reactive CS chains. B, The gene expression levels of six types of proteoglycans were examined by real-time PCR.

# Spplimentary Materials

## Original Images for Blots shown in Supplementary Figure S1

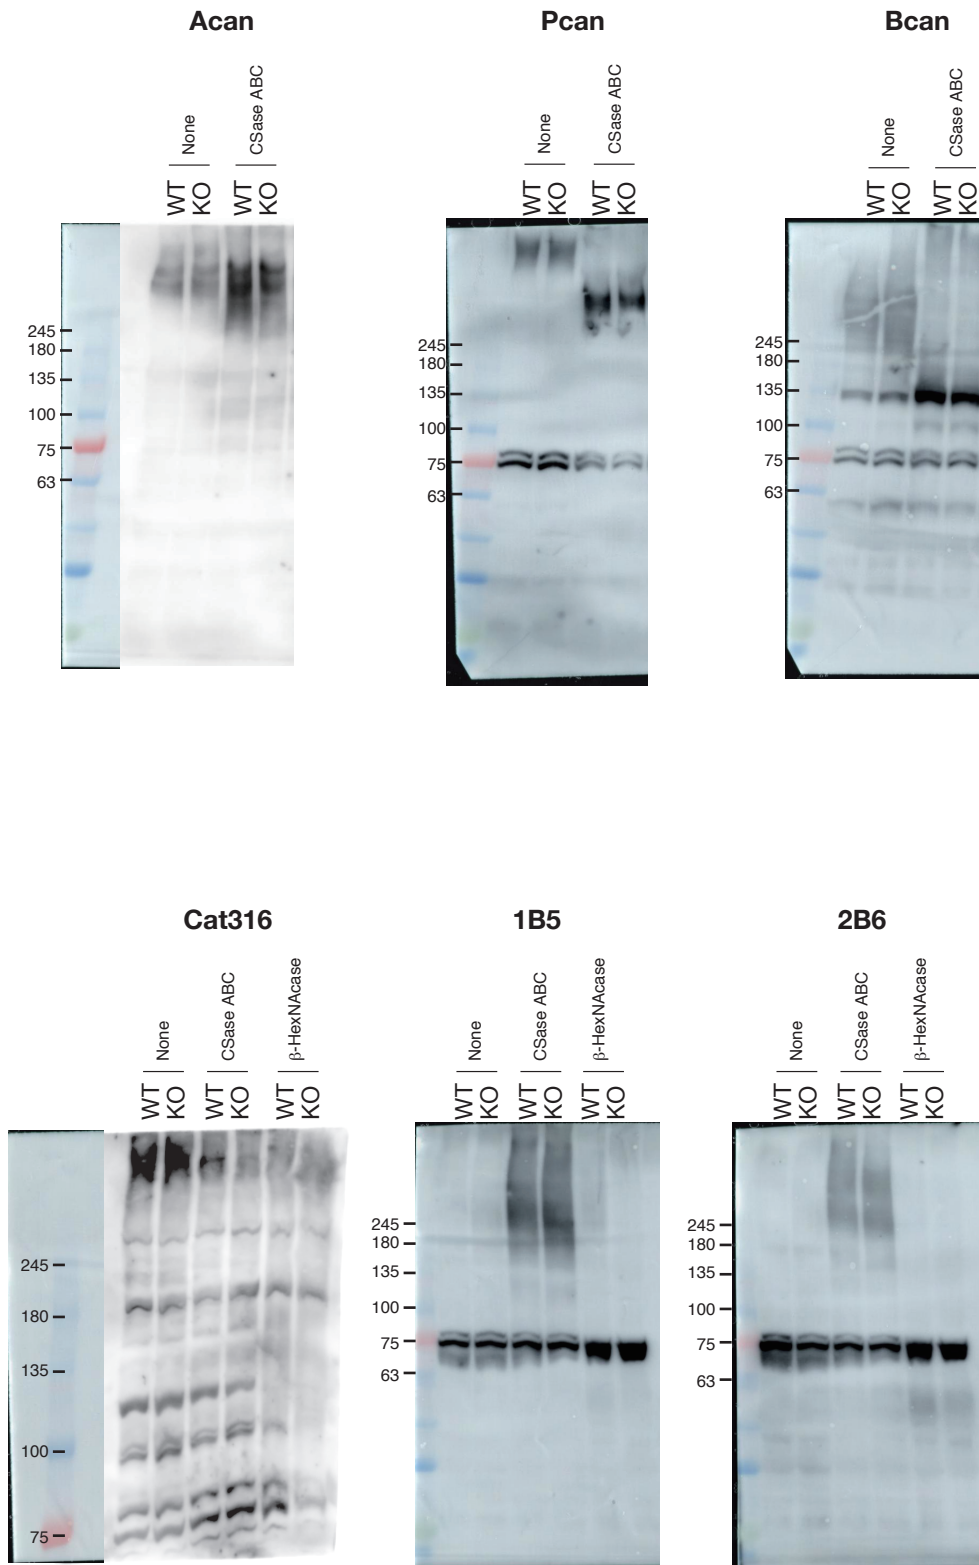

Supplement: biomolecules-10-01499-s001.pdf [file biomolecules-10-01499-s001.pdf]
